# Supplementary material for: A low ion-transfer resistance and high volumetric supercapacitor using hydrophilic surface modified carbon electrodes
Source: Royal Society of Chemistry journal article supplement (doi:10.1039/c4ta00158c), 2014-01-01
Supplement: c4ta00158c1.pdf [file c4ta00158c1.pdf]

## Supporting Information

### Low ion-transfer resistance and high volumetric supercapacitor using hydrophilically surface modified carbon electrodes

*Heejoun Yoo, Misook Min, Sora Bak, Yeohung Yoon and Hyoyoung Lee\**

**Table S1.** Comparison of capacitance of the rGO/CNTs electrode in literature data.

| Ref. | Charateristics                           | Electrolyte, system                                  | Gravitic Capacitance                           | Volumetric Capacitance  |
|------|------------------------------------------|------------------------------------------------------|------------------------------------------------|-------------------------|
| 1    | rGO/SWCNT                                | BMIM BF <sub>4</sub> ,<br>2 electrode                | 222 F g <sup>-1</sup> at 1 A g <sup>-1</sup>   | -                       |
| 2    | rGO/MWCNT,<br>self-assembled             | 1M H <sub>2</sub> SO <sub>4</sub> ,<br>3 electrode   | 279 F g <sup>-1</sup> at 1 A g <sup>-1</sup>   | -                       |
| 3    | GO/MWCNT                                 | 1M H <sub>2</sub> SO <sub>4</sub> ,<br>3 electrode   | 180 F g <sup>-1</sup> at 0.4 A g <sup>-1</sup> | -                       |
| 4    | rGO/MWCNT,<br>amin functionalized        | 0.5M H <sub>2</sub> SO <sub>4</sub> ,<br>3 electrode | 175 F g <sup>-1</sup>                          | -                       |
| 5    | rGO/MWCNT film                           | 6M KOH,<br>3 electrode                               | 265 F g <sup>-1</sup> at 0,1 A g <sup>-1</sup> | -                       |
| 6    | rGO/MWCNT,<br>Poly(ethylenimine) assited | 1M H <sub>2</sub> SO <sub>4</sub> ,<br>3 electrode   | 120 F g <sup>-1</sup> at 1 V s <sup>-1</sup>   | -                       |
| 7    | rGO/SWCNT                                | 1M KCl, 2 electrode                                  | 201 F g <sup>-1</sup> at 0.5 A g <sup>-1</sup> | -                       |
| 8    | rGO/MWCNT                                | 3M KCl, 2 electrode                                  |                                                | 6.1 mF cm <sup>-2</sup> |

**Table S2.** Comparison of capacitance of solid-state supercapacitors demonstrated in this study with literature data.

| Ref              | Characteristics                | Electrolyte, System                | Capacitance / F g <sup>-1</sup> | Volumetric Capacitance                               | Mass loading              | Electrode thickness |
|------------------|--------------------------------|------------------------------------|---------------------------------|------------------------------------------------------|---------------------------|---------------------|
| 9                | SWCNT, printable film          | PVA-H <sub>3</sub> PO <sub>4</sub> | 110 F g <sup>-1</sup>           | 3.62 cm <sup>-2</sup>                                | 33.3 μg cm <sup>-2</sup>  | ~ 0.6 μm            |
| 10               | rGO, Laser scribing            | PVA-H <sub>3</sub> PO <sub>4</sub> | 203.8 F g <sup>-1</sup>         | 7.34 cm <sup>-2</sup>                                | 36.3 μg cm <sup>-2</sup>  | ~ 7.6 μm            |
| 11               | rGO, cellulose composite paper | PVA-H <sub>3</sub> PO <sub>4</sub> | 68.1 F g <sup>-1</sup>          | 46 cm <sup>-2</sup>                                  | 680 μg cm <sup>-2</sup>   | -                   |
| 12               | rGO, Hydrogel solide-state     | PVA-H <sub>2</sub> SO <sub>4</sub> | 93 F g <sup>-1</sup>            | 372 F cm <sup>-2</sup> ,<br>6.25 F cm <sup>-3</sup>  | 2000 μg cm <sup>-2</sup>  | ~ 185 μm            |
| 13               | rGO pattern                    | PVA-H <sub>3</sub> PO <sub>4</sub> | 285 F g <sup>-1</sup>           | 0.462 F cm <sup>-2</sup> ,<br>359 F cm <sup>-3</sup> | 0.315 μg cm <sup>-2</sup> | 0.025 μm            |
| <b>This work</b> | RGO-SCNT25                     | PVA-H <sub>3</sub> PO <sub>4</sub> | 53.2 F g <sup>-1</sup>          | 85 F cm <sup>-2</sup> ,<br>50 F cm <sup>-3</sup>     | 1600 μg cm <sup>-2</sup>  | 17 μm               |
|                  | RGO-SCNT50                     | PVA-H <sub>3</sub> PO <sub>4</sub> | 45.2 F g <sup>-1</sup>          | 81 F cm <sup>-2</sup> ,<br>40 F cm <sup>-3</sup>     | 1800 μg cm <sup>-2</sup>  | 20 μm               |

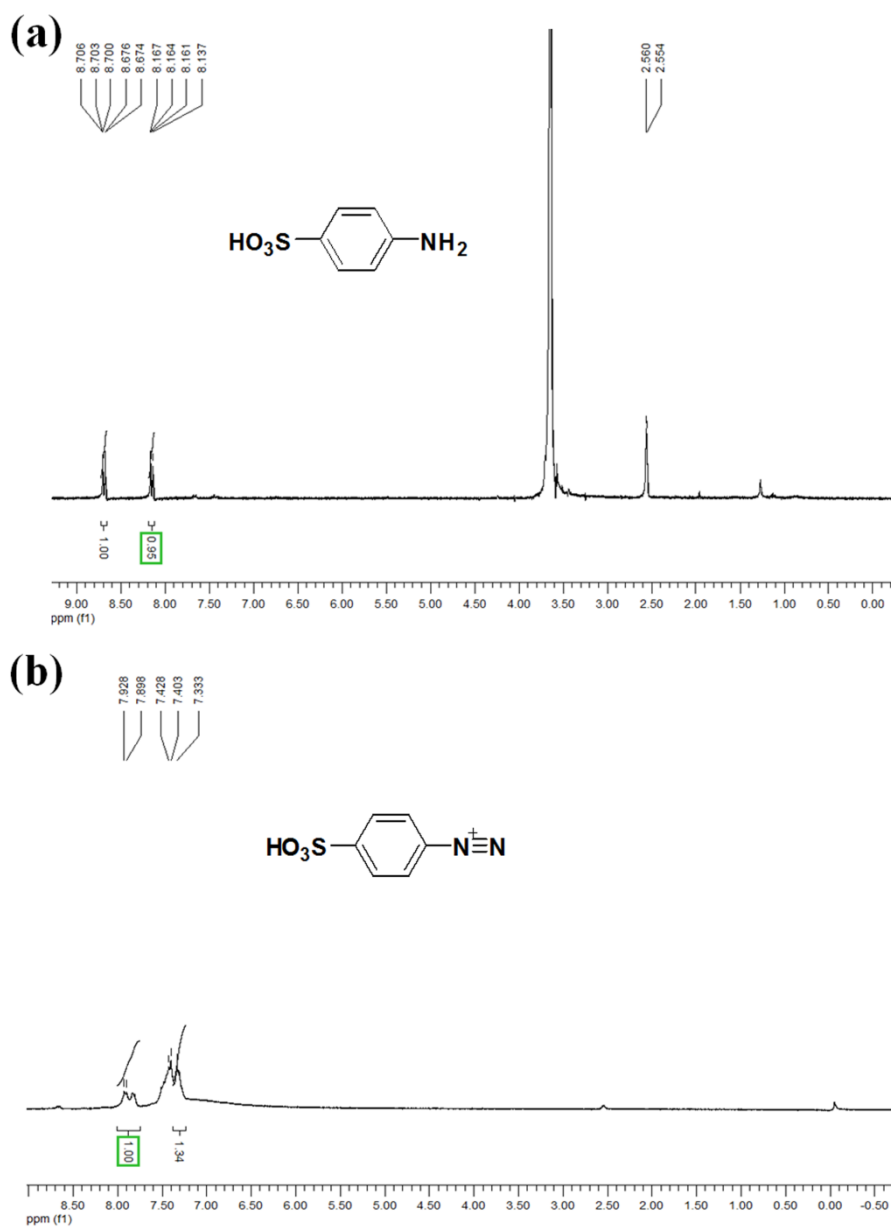

**Fig. S1.** The  $^1\text{H}$  spectra of (a) *p*-sulfonic acid and (b) 4-Benzenediazoniumsulfonate.

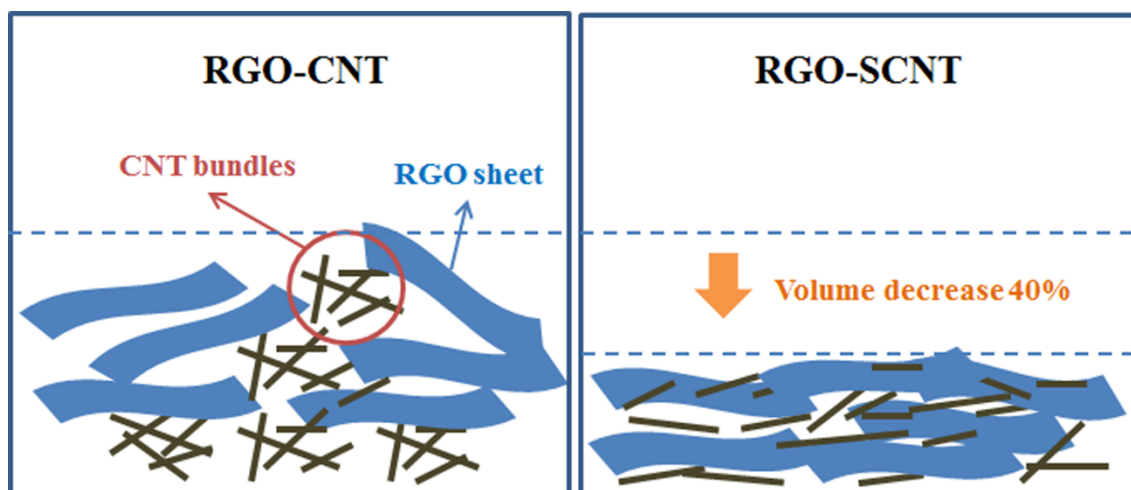

**Fig. S2.** The schematic images of RGO-CNT and RGO-SCNT electrodes.

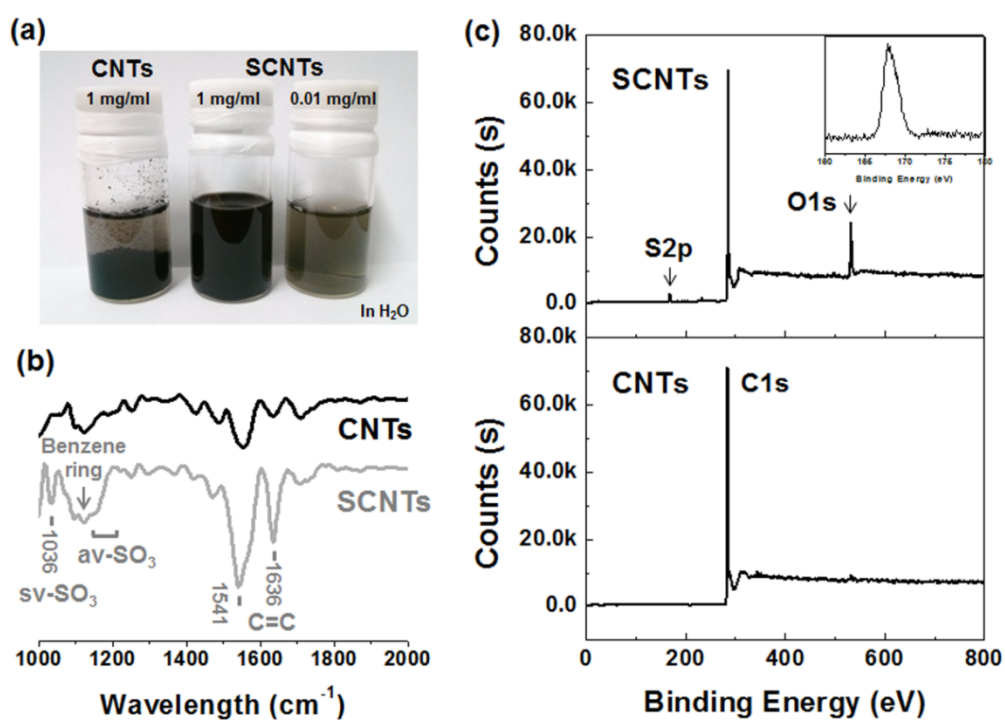

**Fig. S3.** (a) Optical image of CNTs and SCNTs dispersion solution in H<sub>2</sub>O. (b) FT-IR spectra of CNTs and SCNTs. (c) XPS spectra of CNTs and SCNTs.

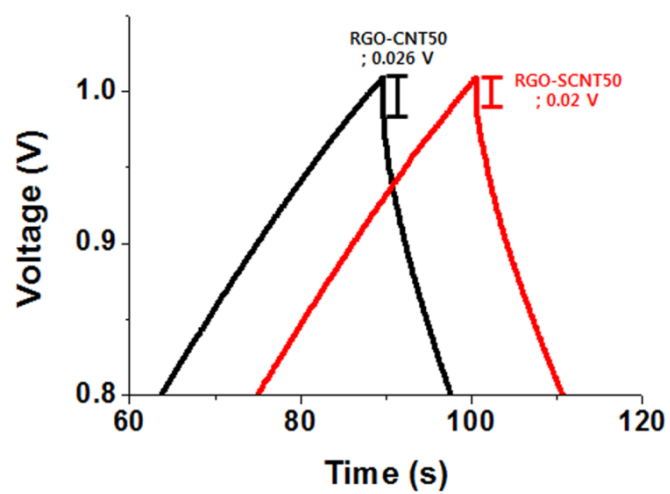

**Fig. S4.** Voltage drops of galvanostatic charge-discharge for RGO-CNT50 and RGO-SCNT50.

|            | Down                                                                                             | Up                                                                                                |
|------------|--------------------------------------------------------------------------------------------------|---------------------------------------------------------------------------------------------------|
| RGO        | 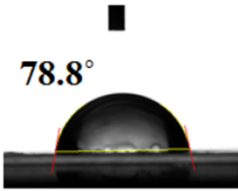 <p>78.8°</p>   |  <p>79.1°</p>   |
| RGO-SCNT25 |  <p>62.7°</p>   |  <p>78.1°</p>   |
| RGO-SCNT50 |  <p>56.3°</p>  |  <p>66.7°</p>  |
| RGO-SCNT75 |  <p>42.7°</p> |  <p>59.0°</p> |

**Figure S5.** The comparison water contact images (down and upside) of RGO, RGO-SCNT25, RGO-SCNT50, and RGO-SCNT75.

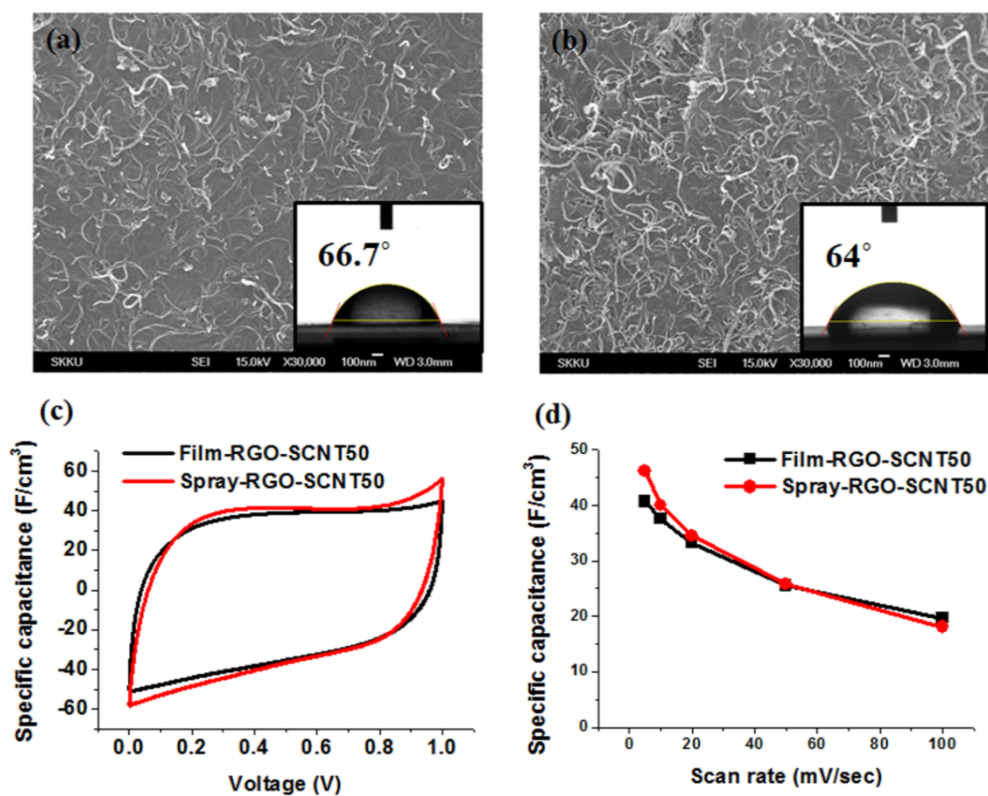

**Fig. S6** The SEM images and water contact angle (inset) of (a) film-RGO-SCNT50, (b) spray-RGO-SCNT50, (c) CV curves at scan rate of 20 mV sec<sup>-1</sup>, (d) Volumetric capacitance with different scan rate from 2 to 100 mV sec<sup>-1</sup>.

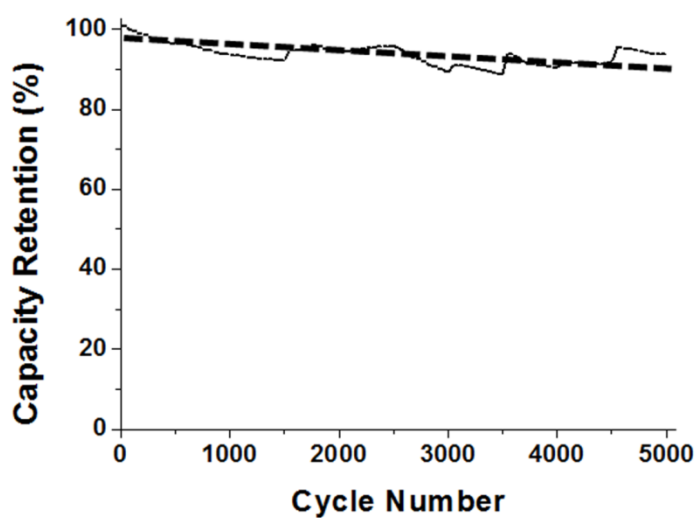

**Fig. S7** Cycling stability of the RGO-SCNT50 at 100mV sec<sup>-1</sup>

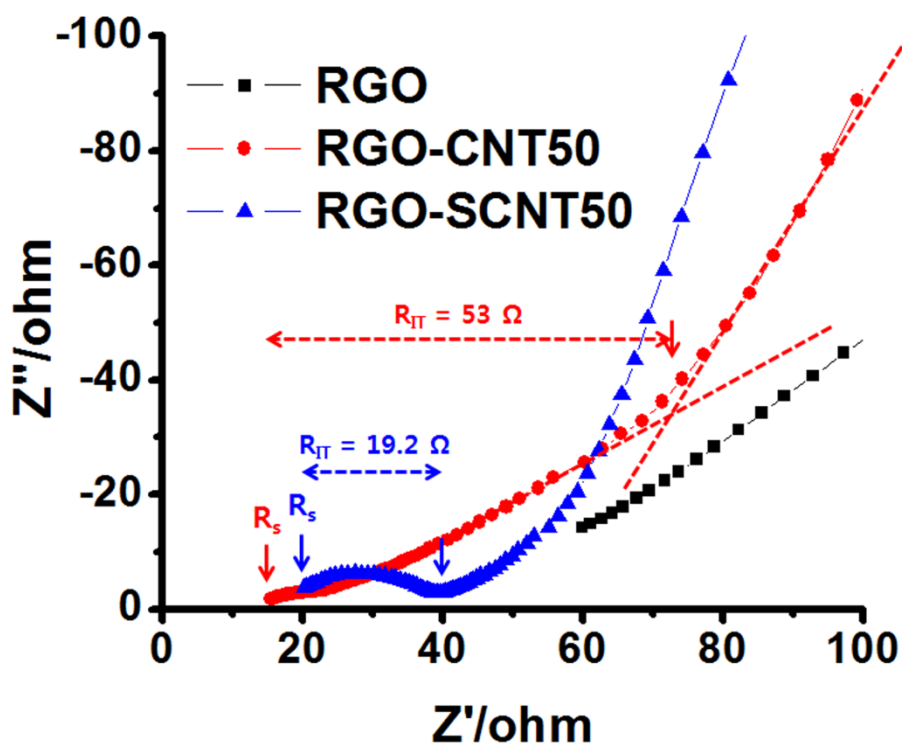

**Fig. S8** Nyquist impedance plots and fitting data for  $R_s$  and  $R_{IT}$ .

**Table S3.** The specification and capacitance data of solid-state supercapacitors demonstrated in this study.

|                  | Electrode specification |             |                             |                                     | Specific capacitance <sup>a)</sup> |                               |                                   | Water contact angles |          | Resistance ( $\Omega$ ) <sup>b)</sup> |          |
|------------------|-------------------------|-------------|-----------------------------|-------------------------------------|------------------------------------|-------------------------------|-----------------------------------|----------------------|----------|---------------------------------------|----------|
|                  | CNT ratio (wt%)         | Weight (mg) | Thickness ( $\mu\text{m}$ ) | Bulk density ( $\text{g cm}^{-3}$ ) | Volumetric ( $\text{F cm}^{-3}$ )  | Areal ( $\text{mF cm}^{-2}$ ) | Gravimetric ( $\text{F g}^{-1}$ ) | Down side            | Top side | $R_s$                                 | $R_{IT}$ |
| RGO              | -                       | 2           | 18                          | 1.11                                | 6.3                                | 10.6                          | 5.3                               | 78.8                 | 79.1     | 60                                    | ~380     |
| RGO-CNT50        | 50                      | 2.1         | 40                          | 0.53                                | 18.5                               | 74                            | 35.2                              | 82.4                 | 89.8     | 15.5                                  | 53       |
| RGO-SCNT25       | 25                      | 1.6         | 17                          | 0.94                                | 50.1                               | 85.2                          | 53.2                              | 62.7                 | 78.1     | 20.8                                  | ~60      |
| RGO-SCNT50       | 50                      | 1.8         | 20                          | 0.9                                 | 40.7                               | 81.4                          | 45.2                              | 56.3                 | 66.7     | 20.2                                  | 19.2     |
| RGO-SCNT75       | 75                      | 1.8         | 28                          | 0.64                                | 16.8                               | 47.1                          | 26.2                              | 42.7                 | 59       | 24.6                                  | 12.3     |
| Spray-RGO-SCNT50 | 50                      | 0.7         | 10                          | 0.7                                 | 46.2                               | 46.2                          | 66.1                              | -                    | -        | -                                     | -        |

a) Calculated from the CV curves at  $5 \text{ mV sec}^{-1}$ ; b) Obtained from the Nyquist impedance plots



## Reference

- 1 N. Jha, P. Ramesh, E. Bekyarova, M. E. Itkis, R. C. Haddon, *Adv. Energy Mater.*, 2012, **2**, 438.
- 2 Z-D. Huang, B. Zhang, S-W. Oh, Q-B. Zheng, X-Y. Lin, N. Yousefi, J-K. Kim, *J. Mater. Chem.*, 2012, **22**, 3591.
- 3 S. H. Aboutalebi, A. T. Chidembo, M. Salari, K. Konstantinov, D. Wexler, H. K. Liu, S. X. Dou, *Energy Environ. Sci.*, 2011, **4**, 1855.
- 4 H. R. Byon, S. W. Lee, S. Chen, P. T. Hammond, Y. Shao-Horn, *Carbon*, 2011, **49**, 457.
- 5 X. Lu, H. Dou, B. Gao, C. Yuan, S. Yang, L. Hao, L. Shen, X. Zhang, *Electrochimica Acta*, 2011, **56**, 5115.
- 6 D. Yu, L. Dai, *J. Phys. Chem. Lett.*, 2010, **1**, 467.
- 7 Q. Cheng, J. Tang, J. Ma, H. Zhang, N. Shinya, L-C. Qin, *Phys. Chem. Chem. Phys.*, 2011, **13**, 17615.
- 8 M. Beidaghi, C. Wang, *Adv. Funct. Mater.*, 2012, **22**, 4501.
- 9 M. Kaempgen, C. K. Chan, J. Ma, Y. Cui, G. Gruner, *Nano Letters*, 2009, **9**, 1872.
- 10 M. F. El-Kady, V. Strong, S. Dubin, R. B. Kaner, *Science*, 2012, **335**, 1326.
- 11 Z. Weng, Y. Su, D-W. Wang, F. Li, J. Du, H-M. Cheng, *Adv. Energy Mater.*, 2011, **1**, 917.
- 12 Y. Xu, Z. Lin, X. Huang, Y. Liu, Y. Huang, X. Duan, *ACS Nano*, 2013, **7**, 4021.
- 13 Z. Niu, L. Zhang, L. Liu, B. Zhu, H. Dong, X. Chen, *Adv. Mater.* 2013, **25**, 4035.
